# Supplementary material for: Biochemical, Ameliorative and Cytotoxic Effects of Newly Synthesized Curcumin Microemulsions: Evidence from In Vitro and In Vivo Studies
Source: MDPI journal article supplement (doi:10.3390/nano11030817), 2021-03-23
Supplement: s1 [file s1]

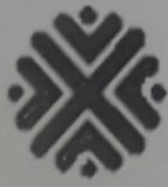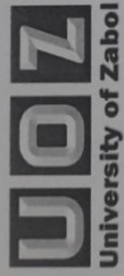

ETHICS COMMITTEE CERTIFICATE OF APPROVAL

This is to certify that

**Project Title:** Investigating on the effects of curcumin and doxorubicin-loaded colloidal nanocarriers on oxidative stress parameters in male Wistar rats.

**Principal Researchers:** Mohammad Amiri Sarkarizi, Dr Mohammad Reza Hajinezhad , Dr Abbas Rahdar

**Dated:** 3-march-2021

Meets the requirements of the Research Ethics Committee. Of University of Zabol

**Ethical code:** IR.UOZ.REC.1399.009

*M. Erfanian*

SIGNED

M. Erfanian

Secretary, Ethics Committee
