# Supplementary material for: Biochemical, Ameliorative and Cytotoxic Effects of Newly Synthesized Curcumin Microemulsions: Evidence from In Vitro and In Vivo Studies
Source: MDPI journal article supplement (doi:10.3390/nano11030817), 2021-03-23
Supplement: s1 [file s1]

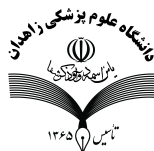

Zahedan University Of Medical Sciences

## Research Ethics Certificate

|                         |                                                                                                                                                                                                                                                                                                                                                                                                                                                                                                                                                                                                                                |                |            |
|-------------------------|--------------------------------------------------------------------------------------------------------------------------------------------------------------------------------------------------------------------------------------------------------------------------------------------------------------------------------------------------------------------------------------------------------------------------------------------------------------------------------------------------------------------------------------------------------------------------------------------------------------------------------|----------------|------------|
| Approval ID:            | IR.ZAUMS.REC.1399.517                                                                                                                                                                                                                                                                                                                                                                                                                                                                                                                                                                                                          | Approval Date: | 2021-03-01 |
| Evaluated by:           | Zahedan University Of Medical Sciences                                                                                                                                                                                                                                                                                                                                                                                                                                                                                                                                                                                         |                |            |
| Status:                 | Approved                                                                                                                                                                                                                                                                                                                                                                                                                                                                                                                                                                                                                       |                |            |
| Approval Statement:     | <p>The project was found to be in accordance to the ethical principles and the national norms and standards for conducting Medical Research in Iran.</p> <p>Notice:</p> <ol style="list-style-type: none"><li>1. Although the proposal has been approved by the research ethics committee, meeting the professional and legal requirements is the sole responsibility of the PI and other project collaborators.</li><li>2. This certificate is reliant on the proposal/documents received by this committee on 2021-03-01. The committee must be notified by the PI as soon as the proposal/documents are modified.</li></ol> |                |            |
| Proposal Title:         | Toxicity/morphology assessment of the effects of synthesized magnetic nanoparticles, colloidal nanocarriers, drug-loaded nanoparticles, and carbon nanotubes on non-cancerous and cancerous human cell lines                                                                                                                                                                                                                                                                                                                                                                                                                   |                |            |
| Principal Investigator: | Name: saman sargazi<br>Email: sgz.biomed@gmail.com                                                                                                                                                                                                                                                                                                                                                                                                                                                                                                                                                                             |                |            |

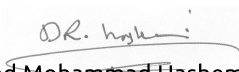  
Dr. Seyed Mohammad Hashemi Shahri  
Director of University/Regional Research Ethics  
Committee  
Zahedan University Of Medical Sciences

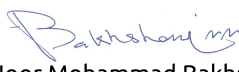  
Dr. Noor Mohammad Bakhshani  
Secretary of University/Regional Research Ethics  
Committee  
Zahedan University Of Medical Sciences
